# Supplementary material for: Epidemiological Investigation and Pathogenicity of Streptococcus suis in Eastern China
Source: Research Square preprint supplement (doi:10.21203/rs.3.rs-6553183/v1), 2025-05-19
Supplement: Supplementary file 1 [file 3209d6a63f0291d6ea9b6a70.xlsx]

## Sheet: Sheet1
Table 2. Primers for identifying virulence genes of S. suis.
Gene	Sequence (5'-3')	Annealing temperature (℃)	PCR product sizes (bp)	Reference
gdh	F: TTCTGCAGCGTATTCTGTCAAACG	55	695	[26]
	R:TGTTCCATGGACAGATAAAGATGG
fbps	F: ATCGATTCATTTAAATAGGTTCCTGCTCGC	55	2179	[28]
	R: GGTACCATTGTTGGTATTTGGACACCAGAA
sly	F: GCTTTATTGCGTGCTGAC	55	1099	[28]
	R: CTGTTCTCCACCACTCCC
orf2	F: CAAGTGTATGTGGATGGG	56	858	[28]
	R: ATCCAGTTGACACGTGCA
mrp	F: CAGATGTGGACCGTAGACC	58	316	[28]
	R: GGATAATCACCAGCAGGAA
89k	F: TCGCCACTATGGTATCTGCTTA	56	720	[28]
	R: GATTGTGGACCATGCTCTTTAG
gapdh	F: CAGTCAAAGCCCGCAACC	58	571	[29]
	R: CCACCGAAGCCAAGAGGT
epf	F: GCTACGACGGCCTCAGAAATC	55	626	[28]
	R: TGGATCAACCACTGGTGTTAC
