# Supplementary material for: Epidemiological Investigation and Pathogenicity of Streptococcus suis in Eastern China
Source: Research Square preprint supplement (doi:10.21203/rs.3.rs-6553183/v1), 2025-05-19
Supplement: Supplementary file 2 [file 59e253efdb5209db29e1c627.xlsx]

## Sheet: Sheet1
Table1. Primers for identifying and serotyping of S. suis.
Serotype	Sequence (5'-3')	Annealing temperature (℃)	PCR product sizes (bp)	Gene	Reference
All	F: TTCTGCAGCGTATTCTGTCAAACG	55	695	gdh	[26]
	R:TGTTCCATGGACAGATAAAGATGG
1	F: GGCGGTCTAGCAGATGCTCG	56	440	cps1I	[27]
	R: GCGAACTGTTAGCAATGAC
2	F: CAAACGCAAGGAATTACGGTATC	56	675	cps2J	[27]
	R: GAGTATCTAAAGAATGCCTATTG
3	F: TGGGAGAAGGCAGAAAGTACGAGA	60	1273	cps3J–cps3K	[26]
	R: ACCCCCAGAAGAGCCGAAGGA
4	F: ACTTGGAGTTGTCGGAGTAGTGCT	60	783	cps4M–cps4N	[26]
	R: ACCGCGATGGATAGGCCGAC
5	F: TGATGGCGGAGTTTGGGTCGC	60	166	cps5N	[26]
	R: CGTAACAACCGCCCCAGCCG
6	F: TACGGTCTCCCTTGCCTGTA	60	325	cps6I	[25]
	R: AACTCAGCTAGTGCTCCACG
7	F: GATGATTTATGGCACCCGAGTAAGC	60	150	cps7H	[26]
	R: AGTCACAATTGCTGGTCCTGACACC
8	F: ATGGGCGTTGGCGGGAGTTT	60	320	cps8H	[26]
	R: TTACGGCCCCCATCACGCTG
9	F: GGGATGATTGCTCGACAGAT	60	300	cps9H	[26]
ss-ser9-R300	R: CCGAAGTATCTGGGCTACTG
10	F: TTACGAGGGGATTCTGGGGT	60	153	cps10M	[25]
ss-ser10-R153	R: CGGGACAACAGATGGAACCT
11	F: TACAGTGCTTGCAGCCCTAC	60	896	cps11N	[25]
	R: CGACTTGTCGTGCCCTGAT
12	F: TGTGGCGATAGGACAACAGG	60	209	cps12J	[25]
	R: ACCAAGAAGTTTCCGCCTGA
13	F: CTGGTGCTGCAATTTCGCTT	60	1135	cps13L	[25]
	R:GCAGACTAGCTGCAGTTCCA
14	F: AATCATGGAATAAAGCGGAGTACAG	60	550	cps14J	[26]
	R: ACAATTGATACGTCAAAATCCTCACC
15	F: GCAAGAAAGCTTCCGGATGGA	60	274	cps15K	[25]
	R: CAAGAGAGTGTGCAACCCCA
16	F: TGGAGGAGCATCTACAGCTCGGAAT	60	202	cps16K	[26]
	R: TTTGTTTGCTGGAATCTCAGGCACC
17	F: ACTTGGGTTGGAATGGCGAA	60	906	cps17O	[25]
	R: ACCACCGAAAGTCAGGTCAC
18	F: CGGGGCAGTCTTACTCATGG	60	432	cps18N	[25]
	R: ATGACAGCGAAACGGACAGA
19	F: AGCAGGGTTGCGTATGGCGG	60	1024	cps19L	[26]
	R: ACAAGCACCAGCAAAGACCGCA
20	F: TAATCGTTGCCTTTGAGCAT	58	938	cps20I	[6]
	R: CGCTATATAAGGAAACCTCGG
21	F: GGTGGCAAGGAGAGCAAAGT	60	325	cps21N	[25]
	R: ACATGGTAAGCCATTGCTGGA
22	F: AGGATCGGTAAGTTTAGGTACA	58	158	cps22K	[6]
	R: ATGCAGTAAAACACGAAAACAA
23	F: TGCTCAACAAACGCAGCAAA	60	454	cps23I	[25]
	R: TGACTGGTACATCTGCAGCC
24	F: ACCCGGAAAAACCAGGAGTT	60	500	cps24L	[25]
	R: ACCAATCAATGCCAAGCGAC
25	F: GGAGGAGCTGCGGGCTCATA	60	1211	cps25M–cps25N	[26]
	R: TGGCCACAACCTGGATGCGTT
26	F: CAAAATTCCTGGATTAACGCTT	58	315	cps26P	[6]
	R: CGATCTGAGGACTTATCAAGAA
27	F: CTACGCCAATCGAAGCCAGA	60	506	cps27K	[25]
	R: CCAGTAAGAAGCCTGTCGCA
28	F: GGACTTCGGTACCTTAGCGT	60	865	cps28L	[25]
	R: CTCCAGCACATTCCCGTACC
29	F: GTGCGGGCGTTATTTTTGGT	60	435	cps29L	[25]
	R: AGCCTTGCAACCCATTTCCT
30	F: CTTTAATTGCTTGCGCCCGT	60	170	cps30I	[25]
	R: ATTCGGGCTACCCATTGCAG
31	F: GGAGTGCTCTATGCCACCTT	60	550	cps31L	[25]
	R: GCATTGCCCCTACAGCAAAC
33	F: GAGTTGCGACCTATTATTCTCA	58	731	cps33K	[6]
	R: GAATTGAACAACGACTGCAATA
